# Supplementary material for: Identification of cross-talk between m6A and 5mC regulators associated with onco-immunogenic features and prognosis across 33 cancer types
Source: PubMed Central journal article supplement (PMC7081591; doi:10.1186/s13045-020-00854-w), 2020-03-18

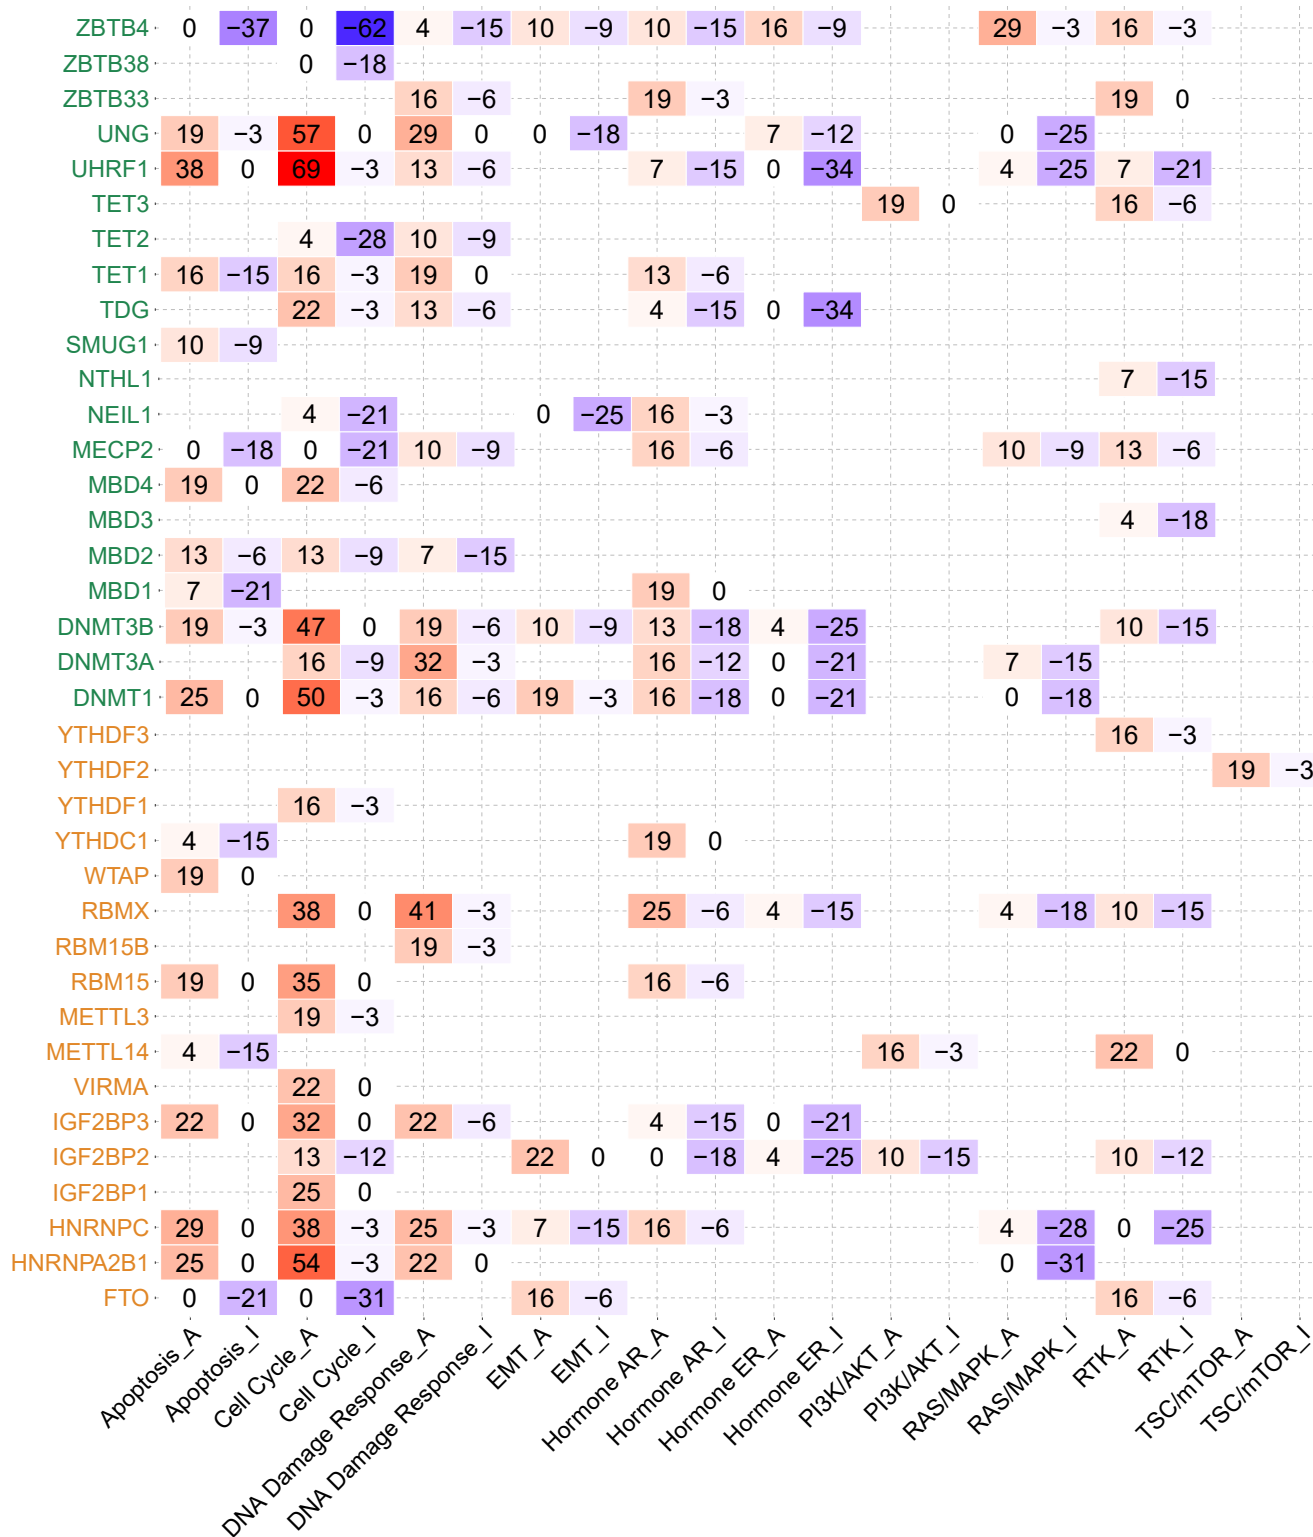

5mC  
m<sup>6</sup>A

Pathway (A:Activate; I:Inhibit)

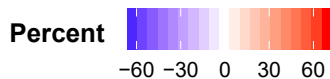

Supplement: 13045_2020_854_MOESM3_ESM.pdf [file 13045_2020_854_MOESM3_ESM.pdf]
